# Supplementary material
Source: Royal Society of Chemistry journal article supplement (doi:10.1039/b109481p), 2001-11-30
Supplement: b109481p.doc [file b109481p.doc]

Supplementary Data

Synthesis and spectroscopic characterization of 1: In a typical experiment, nickel acetate tetrahydrate (53.7 mg, 0.216 mmol), 1,2-dicyanobenzene (98.9 mg, 0.772 mmol) and 4 mL methanol were combined in a PTFE-lined stainless steel autoclave and heated for 6.5 d at 70 ˚C. Upon opening the autoclave, a red solution and fine blue powder were observed, along with large red-orange block-shaped crystals that were suitable for X-ray crystallographic study. The blue powder was determined to be phthalocyaninato nickel (II) by comparison of its IR spectrum to that of an authentic sample. The solution was determined, by UV-VIS spectroscopy, to contain unreacted 1,2-dicyanobenzene and a small amount of material identical in composition to the red-orange blocks, along with uncharacterized byproducts. The red-orange blocks were determined *via* X-ray crystallographyto be 14,28-dimethoxyphthalocyaninato nickel (II) (1). The yield of 1 after physical separation from the blue powder was 52.0 mg (0.0782 mmol, 36.2% based upon Ni). Secondary characterization was accomplished *via* UV-VIS and IR spectroscopy. Bulk sample purity was ascertained by comparison of UV-VIS spectra to those of crystals from the same sample that was used for X-ray analysis. VIS (toluene): 663.50 nm ( = 242 M-1cm-1), 568 nm ( = 2430 M-1cm-1), 532 nm (sh), 470 nm ( = 4860 M-1cm-1), 410 nm ( = 3269 M-1cm-1). Molar absorbtivities for peaks in the ultraviolet were not determined, due to the use of toluene as a solvent and the strong absorbance of this solvent in the UV. Toluene was necessary in order to achieve sufficient solubility for the accurate determination of values. However, in methanol, maxima (with undetermined molar absorbtivities) were observed at 318 nm, 281 nm, 252 nm, and 204 nm. IR (KBr pellet, cm-1): 3443(br), 3063 (w), 2936 (w), 2826 (w), 1646 (m), 1616 (w), 1530 (s), 1488 (vs), 1458 (s), 1409 (s), 1386 (m), 1328 (w), 1292 (m), 1281(m), 1248 (m), 1200 (m), 1165 (m), 1156 (w), 1144 (m), 1126 (m), 1096 (m), 1070 (s), 1040 (s), 1023 (m), 987 (w), 967 (w), 947 (w), 922 (w), 902 (w), 774 (m), 738 (m), 724 (m), 698 (w), 668 (w), 654 (w), 647 (w).

Synthesis and spectroscopic characterization of 2: In a typical experiment, nickel acetate tetrahydrate (53.8 mg, 0.216 mmol), 1,2-dicyanobenzene (98.9 mg, 0.772 mmol) and 4 mL ethanol were combined in a PTFE lined stainless steel autoclave and heated for 4 d at 90 ˚C. The contents of the autoclave after the heating period were nearly identical in appearance to those observed for the analogous reaction in methanol. The red-orange blocks were determined *via* X-ray crystallographyto be 14,28-diethoxyphthalocyaninato nickel (II) (2). The yield of 2 after physical separation from the blue powder was 38.2 mg (0.0578 mmol, 26.8%). Secondary characterization was accomplished *via* visible and IR spectroscopy. Bulk sample purity was ascertained by comparison of visible spectra to those of single crystals from the same sample that was used for X-ray crystallography. VIS (toluene): 663 nm ( = 241 M-1cm-1), 568 nm ( = 2210 M-1cm-1), 546 nm (sh), 470 nm (4430 M-1cm-1), 410 nm ( = 2930 M-1cm-1). As in the case of 1, the use of toluene in order to achieve sufficient solubility for accurate determination of molar absorbtivities prevented the measurement of peaks in the ultraviolet. IR(KBr pellet): 3453 (br), 2967 (m), 2923 (m), 2856 (w), 1634 (m), 1604 (w), 1537 (s), 1488 (vs), 1457 (s), 1410 (m), 1385 (m), 1328 (w), 1294 (m), 1283(m), 1245 (m), 1198 (m), 1166 (m), 1146 (m), 1132 (m), 1108 (m), 1098 (m), 1063 (m), 1041 (m), 1009 (m), 959 (w), 925 (w), 891 (w), 776 (m), 733 (m), 727 (m), 673 (w), 658 (w), 621 (w).
